# Supplementary material for: ge-CRISPR - An integrated pipeline for the prediction and analysis of sgRNAs genome editing efficiency for CRISPR/Cas system
Source: PubMed Central journal article supplement (PMC5007494; doi:10.1038/srep30870), 2016-09-01
Supplement: srep30870-s1.pdf [file srep30870-s1.pdf]

**ge-CRISPR - An integrated pipeline for the prediction and analysis of sgRNAs genome editing efficiency for CRISPR/Cas system**

Karambir Kaur<sup>#</sup>, Amit Kumar Gupta<sup>#</sup>, Akanksha Rajput<sup>#</sup> and Manoj Kumar\*

Bioinformatics Centre, Institute of Microbial Technology, Council of Scientific and Industrial Research, Sector 39A, Chandigarh-160036, India

# Equal contribution

\* To whom correspondence should be addressed: [manojk@imtech.res.in](mailto:manojk@imtech.res.in)

Karambir Kaur

Bioinformatics Centre, Institute of Microbial Technology, Council of Scientific and Industrial Research, Sector 39A, Chandigarh-160036, India,  
[karman@imtech.res.in](mailto:karman@imtech.res.in)

Amit Kumar Gupta

Bioinformatics Centre, Institute of Microbial Technology, Council of Scientific and Industrial Research, Sector 39A, Chandigarh-160036, India,  
[amitg@imtech.res.in](mailto:amitg@imtech.res.in)

Akanksha Rajput

Bioinformatics Centre, Institute of Microbial Technology, Council of Scientific and Industrial Research, Sector 39A, Chandigarh-160036, India,  
[akanksha@imtech.res.in](mailto:akanksha@imtech.res.in)

Manoj Kumar

Bioinformatics Centre, Institute of Microbial Technology, Council of Scientific and Industrial Research, Sector 39A, Chandigarh-160036, India,  
[manojk@imtech.res.in](mailto:manojk@imtech.res.in)

## Supplementary information

**Figure S1: Workflow of pipeline-1.** (a) sgRNA scanner for extracting sgRNAs in user provided genome/gene (b) output of pipeline-1 depicting high and low potency sgRNAs (c) sgRNA profile, displaying secondary structure and off-targets associated with individual sgRNA.

**Table S1.** Performance of geCRISPRc predictive models on sgRNA designer dataset (1841)

**Table S2.** Performance of geCRISPRc predictive models on sgRNA scorer (Cas<sub>sp</sub>) dataset (297)

**Table S3.** Performance of geCRISPRc predictive models on sgRNA scorer (Cas<sub>st1</sub>) dataset (171)

**Table S4.** Performance of geCRISPRr predictive models on CRISPRscan dataset (1020)



**Table S1: Performance of geCRISPRc predictive models on sgRNA designer dataset (1841)**

| <b>S.No</b> | <b>Properties</b>   | <b>Length</b> | <b>Vector</b> | <b>Acc</b> | <b>Mcc</b> | <b>ROC</b> |
|-------------|---------------------|---------------|---------------|------------|------------|------------|
| 1           | Composition (mono)  | 20            | 4             | 68.34      | 0.37       | 0.73       |
| 2           | Composition (di)    | 20            | 16            | 75.68      | 0.52       | 0.84       |
| 3           | Composition (tri)   | 20            | 64            | 78.8       | 0.59       | 0.87       |
| 4           | Composition (tetra) | 20            | 256           | 74.32      | 0.49       | 0.82       |
| 5           | Composition (penta) | 20            | 1024          | 70.65      | 0.44       | 0.78       |
| 6           | Binary (mono)       | 20            | 80            | 97.42      | 0.95       | 0.99       |
| 7           | Binary (di)         | 20            | 304           | 97.28      | 0.95       | 1.00       |
| 8           | Binary (tri)        | 20            | 1152          | 93.34      | 0.87       | 0.98       |
| 9           | Thermodynamic       | 20            | 21            | 78.4       | 0.57       | 0.84       |
| 10          | Secondary structure | 20            | 20            | 60.19      | 0.24       | 0.63       |
| 11          | 1+2                 | 20            | 20            | 87.09      | 0.74       | 0.93       |
| 12          | 1+2+3               | 20            | 84            | 85.6       | 0.72       | 0.93       |
| 13          | 1+2+3+4             | 20            | 340           | 83.97      | 0.69       | 0.93       |
| 14          | 1+2+3+4+5           | 20            | 1364          | 83.83      | 0.68       | 0.91       |
| 15          | 6+7                 | 20            | 384           | 97.83      | 0.96       | 1.00       |
| 16          | 6+7+8               | 20            | 1536          | 96.88      | 0.94       | 1.00       |
| 17          | 1+2+3+4+5+6+7+8     | 20            | 2900          | 88.72      | 0.77       | 0.95       |
| 18          | 1+2+6+7             | 20            | 404           | 96.88      | 0.94       | 0.99       |
| 19          | 1+2+3+4+6+7         | 20            | 724           | 91.98      | 0.84       | 0.97       |
| 20          | 1+2+6+7+9           | 20            | 425           | 96.33      | 0.93       | 0.99       |
| 21          | 1+2+6+7+10          | 20            | 424           | 96.47      | 0.93       | 0.99       |
| 22          | 1+2+6+7+9+10        | 20            | 445           | 94.43      | 0.89       | 0.99       |

Acc, accuracy; MCC, Matthew's correlation coefficient; AUC, area under curve

**Table S2: Performance of geCRISPRc predictive models on sgrNAScorer (Cas<sub>sp</sub>) dataset (297)**

| S.No | Properties          | Length | Vector | Acc   | Mcc  | ROC  |
|------|---------------------|--------|--------|-------|------|------|
| 1    | Composition (mono)  | 23     | 4      | 68.46 | 0.37 | 0.72 |
| 2    | Composition (di)    | 23     | 16     | 70.97 | 0.42 | 0.74 |
| 3    | Composition (tri)   | 23     | 64     | 67.03 | 0.34 | 0.70 |
| 4    | Composition (tetra) | 23     | 256    | 65.95 | 0.34 | 0.68 |
| 5    | Composition (penta) | 23     | 1024   | 62.01 | 0.24 | 0.63 |
| 6    | Binary (mono)       | 23     | 92     | 74.91 | 0.53 | 0.83 |
| 7    | Binary (di)         | 23     | 352    | 74.91 | 0.50 | 0.81 |
| 8    | Binary (tri)        | 23     | 1344   | 70.61 | 0.46 | 0.80 |
| 9    | Thermodynamic       | 23     | 21     | 64.52 | 0.31 | 0.66 |
| 10   | Secondary structure | 23     | 23     | 63.08 | 0.28 | 0.64 |
| 11   | 1+2+3+4             | 23     | 340    | 69.89 | 0.40 | 0.73 |
| 11   | 1+2+3+4+5           | 23     | 1364   | 70.25 | 0.40 | 0.83 |
| 13   | 6+7                 | 23     | 444    | 76.70 | 0.53 | 0.73 |
| 14   | 6+7+8               | 23     | 1788   | 76.70 | 0.54 | 0.82 |
| 15   | 1+2+3+4+5+6+7+8     | 23     | 3152   | 69.89 | 0.40 | 0.73 |
| 16   | 1+2+3+4+6+7         | 23     | 784    | 70.61 | 0.41 | 0.73 |

Acc, accuracy; MCC, Matthew's correlation coefficient; AUC, area under curve

**Table S3: Performance of geCRISPRc predictive models on sgRNAscorer (Cas<sub>st1</sub>) dataset (151)**

| S.No | Properties          | Length | Vector | Acc   | Mcc  | ROC  |
|------|---------------------|--------|--------|-------|------|------|
| 1    | Composition (mono)  | 27     | 4      | 74.17 | 0.49 | 0.78 |
| 2    | Composition (di)    | 27     | 16     | 75.5  | 0.51 | 0.75 |
| 3    | Composition (tri)   | 27     | 64     | 72.85 | 0.46 | 0.77 |
| 4    | Composition (tetra) | 27     | 256    | 70.2  | 0.45 | 0.73 |
| 5    | Composition (penta) | 27     | 1024   | 66.23 | 0.34 | 0.70 |
| 6    | Binary (mono)       | 27     | 108    | 83.44 | 0.67 | 0.89 |
| 7    | Binary (di)         | 27     | 416    | 79.47 | 0.59 | 0.86 |
| 8    | Binary (tri)        | 27     | 1600   | 73.51 | 0.46 | 0.75 |
| 9    | Thermodynamic       | 27     | 21     | 74.17 | 0.48 | 0.77 |
| 10   | Secondary structure | 27     | 27     | 66.89 | 0.39 | 0.65 |
| 11   | 1+2+3+4             | 27     | 340    | 73.51 | 0.49 | 0.79 |
| 12   | 1+2+3+4+5           | 27     | 1364   | 73.51 | 0.48 | 0.77 |
| 13   | 6+7                 | 27     | 524    | 82.78 | 0.65 | 0.89 |
| 14   | 6+7+8               | 27     | 2124   | 82.67 | 0.66 | 0.88 |
| 15   | 1+2+3+4+5+6+7+8     | 27     | 3488   | 72.85 | 0.47 | 0.77 |
| 16   | 1+2+3+4+6+7         | 27     | 864    | 73.51 | 0.47 | 0.76 |

Acc, accuracy; MCC, Matthew's correlation coefficient; AUC, area under curve

**Table S4: Performance of geCRISPRr predictive models on CRISPRscan dataset (1020)**

| S.No | Properties                      | Length | Vector | PCC  |
|------|---------------------------------|--------|--------|------|
| 1    | Composition (mono-di-tri-tetra) | 20     | 340    | 0.42 |
| 2    | Binary (mono-di)                | 20     | 384    | 0.43 |
| 3    | 1+2                             | 20     | 724    | 0.43 |

PCC; Pearson correlation coefficient
